# Supplementary material for: Ultrasound Can Be Usefully Integrated with the Clinical Assessment of Nail and Enthesis Involvement in Psoriasis and Psoriatic Arthritis
Source: MDPI journal article supplement (doi:10.3390/jcm11216296), 2022-10-26
Supplement: s1 [file s1]

SUPPLEMENTARY DATA

Supplementary Table S1. Subtypes of nail psoriasis.

| Parameters               | PsA (n=154) | PsO(n=35) | p value       |
|--------------------------|-------------|-----------|---------------|
| Nail matrix              |             |           |               |
| Pitting                  | 61(39.6%)   | 20(57.1%) | 0.067         |
| Leukonychia              | 25(16.2%)   | 8(22.9%)  | 0.317         |
| Red spots in the lunula  | 0(0%)       | 0(0%)     | -             |
| Crumbling                | 26(16.9%)   | 8(22.9%)  | 0.426         |
| Nail bed                 |             |           |               |
| Onycholysis              | 69(44.8%)   | 20(57.1%) | 0.210         |
| Splinter hemorrhage      | 18(11.7%)   | 8(22.9%)  | 0.089         |
| Subungual hyperkeratosis | 18(11.7%)   | 9(25.7%)  | <b>0.035*</b> |
| Oil stains               | 2(1.3%)     | 0(0%)     | 0.495         |

PsO, psoriasis; PsA, psoriatic arthritis; n, the number of patients

Supplementary Table S2. Independent predictors of fingernail thickness in patients with PsA and PsO.

| Independent variables    | t, adjusted OR (95%CI) | p             |
|--------------------------|------------------------|---------------|
| Age (years)              | 1.019 (0.989-1.051)    | 0.217         |
| Gender (male vs. female) | 1.136 (0.439-2.939)    | 0.739         |
| Body mass index (kg/m2)  | 1.015 (0.916-1.125)    | 0.775         |
| NAPSI                    | 0.977 (0.959-0.995)    | <b>0.013*</b> |
| GUESS                    | 1.332 (1.046-1.696)    | <b>0.020*</b> |

PsO, psoriasis; PsA, psoriatic arthritis; NAPSI, nail psoriasis severity index; GUESS, Glasgow Ultrasound Enthesitis Scoring System.
